# Supplementary material for: A graphene-based fluorescent nanoprobe for silver(i) ions detection by using graphene oxide and a silver-specific oligonucleotide
Source: Royal Society of Chemistry journal article supplement (doi:10.1039/b924832c), 2010-01-01
Supplement: b924832c.pdf [file b924832c.pdf]

**Electronic Supporting Information for the Article:**

# **A Graphene-based Fluorescent Nanoprobe for Silver(I) Ions Detection by using Graphene Oxide and a Silver-Specific Oligonucleotide**

Yanqin Wen,<sup>a</sup> Feifei Xing,<sup>b</sup> Shijiang He,<sup>a</sup> Shiping Song,<sup>a</sup> Lihua Wang,<sup>a</sup> Yitao Long,<sup>c</sup>  
Di Li,<sup>a\*</sup> Chunhai Fan<sup>a\*</sup>

<sup>a</sup>*Laboratory of Physical Biology, Shanghai Institute of Applied Physics, Chinese Academy of Sciences, Shanghai 201800, China,*

<sup>b</sup>*School of Science, Department of chemistry, Shanghai University, Shanghai 200444, China*

<sup>c</sup>*School of Chemistry and Chemical Engineering, East China University of Science and Technology, Shanghai, 200237, China*

## **Experimental Section**

### **Materials**

The DNA oligonucleotide (SSO, 5'-FAM-CTCTCTTCTCTTCATTTTTCAACA CAACACAC-3') was synthesized by Takara Biotechnology Co. (Dalian, China) and purified by HPLC. The colored bases in this sequence are the binding site for Ag<sup>+</sup>. 3-morpholinopropanesulfonic acid (MOPs) was purchased from sigma. AgNO<sub>3</sub>, LiNO<sub>3</sub>, Ca(NO<sub>3</sub>)<sub>2</sub>, Mg(CH<sub>3</sub>COO)<sub>2</sub>, Cu(NO<sub>3</sub>)<sub>2</sub>, Zn(NO<sub>3</sub>)<sub>2</sub>, Cd(NO<sub>3</sub>)<sub>2</sub>, Co(NO<sub>3</sub>)<sub>2</sub>, Mn(CH<sub>3</sub>COO)<sub>2</sub>, Ni(NO<sub>3</sub>)<sub>2</sub>, Pb(NO<sub>3</sub>)<sub>2</sub>, Hg(NO<sub>3</sub>)<sub>2</sub> and FeCl<sub>3</sub> were of analytical grade and used as received. All solutions were prepared with Milli-Q water (18 MΩ cm<sup>-1</sup>) from a Millipore system. Environmental water sample was taken from a nearby river and centrifuged to remove the insoluble impurities.

### **Preparation of GO**

GO was synthesized from graphite powder based on the Hummer's method. Briefly, graphite powder (4 g) was oxidized in a hot solution (80°C) of concentrated H<sub>2</sub>SO<sub>4</sub> (24 mL) containing K<sub>2</sub>S<sub>2</sub>O<sub>8</sub> (8 g), and P<sub>2</sub>O<sub>5</sub> (8 g). The resulting dark blue mixture was thermally isolated and slowly cooled to room temperature over a period of 6 h. The

mixture was diluted to 300 mL, and then filtrated with a filter membrane of 0.22  $\mu\text{m}$  (Generay Biotech Co., Ltd., Shanghai, China) and dried overnight at 60°C. These preoxidized graphite powder (2 g) was added to 92 mL of cold  $\text{H}_2\text{SO}_4$  (0°C), to which  $\text{KMnO}_4$  (12 g) was gradually added under continuous stirring in ice-bath. After 15 min,  $\text{NaNO}_3$  (2 g) was added to the mixture. The solution was further stirred for 2 h at 35 °C and distilled water (200 mL) was added. The reaction was stopped with the addition of a mixture of 560 mL of distilled water and 10 mL of  $\text{H}_2\text{O}_2$  (30 %). The product was washed with  $\text{HCl}$  (1:10) and then with water, and then suspended in distilled water. The brown dispersion was extensively dialyzed to remove residual metal ions and acids, and then exfoliated via sonication for 1.5 h (300 W). Unexfoliated graphite oxide was removed by centrifugation (3000 rpm, 5 min) using Centrifuge himac-CF 16RX (Hitachi, Japan).

#### **Fluorescence assay for Ag(I) Ions**

$\text{Ag(I)}$  ions of different concentrations were incubated in MOPS buffer (1 mL, pH 7.0) containing 50 mM of  $\text{NaNO}_3$  and 10 nM of SSO for 5 min at 23°C. Then 20 $\mu\text{L}$  of GO (0.5  $\mu\text{g}/\mu\text{L}$ ) was added to this mixture and the fluorescence measurement was carried out 2 min after the GO addition at 23°C.

#### **Instruments**

The fluorescence spectra were measured using a Hitachi F-4500 spectrophotometer equipped with a Xenon lamp excitation source. The excitation wavelength was  $\lambda=494$  nm, and the fluorescence measurements were carried out at 23°C.

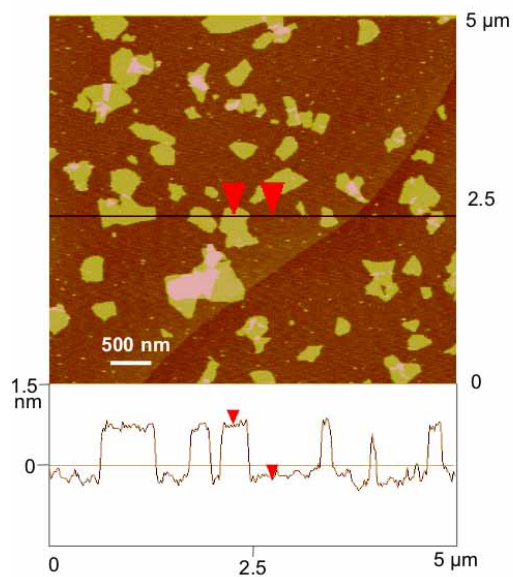

Figure S1 AFM tapping-mode image of the as-prepared GO sheets and the height profile along the dashed line in panel.

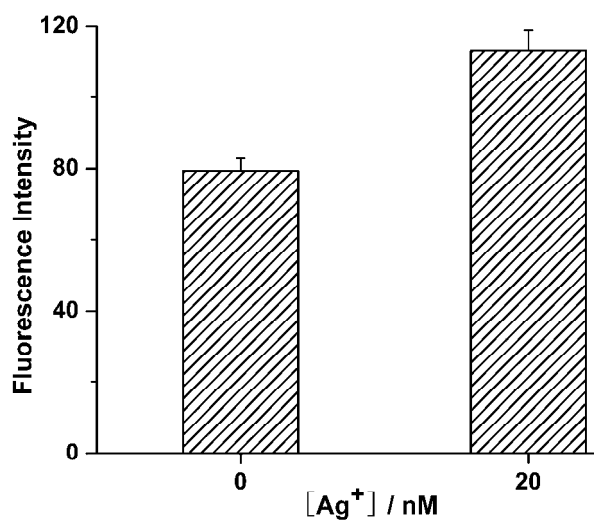

Figure S2 Comparison of the response of LOQ (20 nM of Ag<sup>+</sup>) with the background signal (0 nM of Ag<sup>+</sup>).

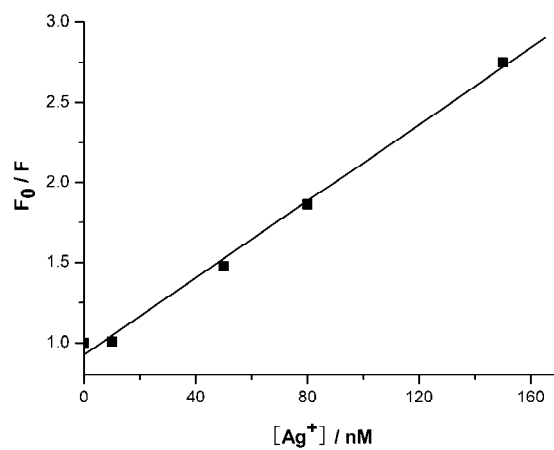

Figure S3 Stern-Volmer plot of the FAM-labeled SSO probe quenched by Ag<sup>+</sup>.
